# Supplementary material for: New Caledonian Crows Rapidly Solve a Collaborative Problem without Cooperative Cognition
Source: PLoS One. 2015 Aug 12;10(8):e0133253. doi: 10.1371/journal.pone.0133253 (PMC4534463; doi:10.1371/journal.pone.0133253)
Supplement: S1 Data — (XLSX) [file pone.0133253.s002.xlsx]

## Sheet: Inequity Aversion
Data S2: Inequity Aversion
Test 1b: Number of stones passed /10
Bird	Naïve	Low Equity	High Equity	Low Inequity	High Inequity	Super Inequity
RGR	Y	1	9	2	9	6
BWB	N	3	8	9	8	9
OBB	N	10	10	10	10	10
YBB	Y	8	9	10	10	9
OGG	Y	7	6	8	9	9
GBG	N	6	10	7	7	10
Test 2c: Number of stones passed /10
Bird	Naïve	Low Equity	High Equity	Advantageous Inequity	Disadvantageous Inequity
D4-R	Y	10	10	10	10
RW-Y	Y	9	10	7	10
D4-B	Y	8	9	10	8
LB	N	10	10	10	10
D3-R	N	9	9	10	10
D3-B	Y	8	10	9	9
